# Supplementary material for: Loss of Ranbp2 in motor neurons causes the disruption of nucleocytoplasmic and chemokine signaling and proteostasis of hnRNPH3 and Mmp28, and the development of amyotrophic lateral sclerosis (ALS)-like syndromes
Source: Oxford University Press journal article supplement (doi:10.1242/dmm.027730), 2017-01-01
Supplement: dmm027730supp.pdf [file dmm027730supp.pdf]

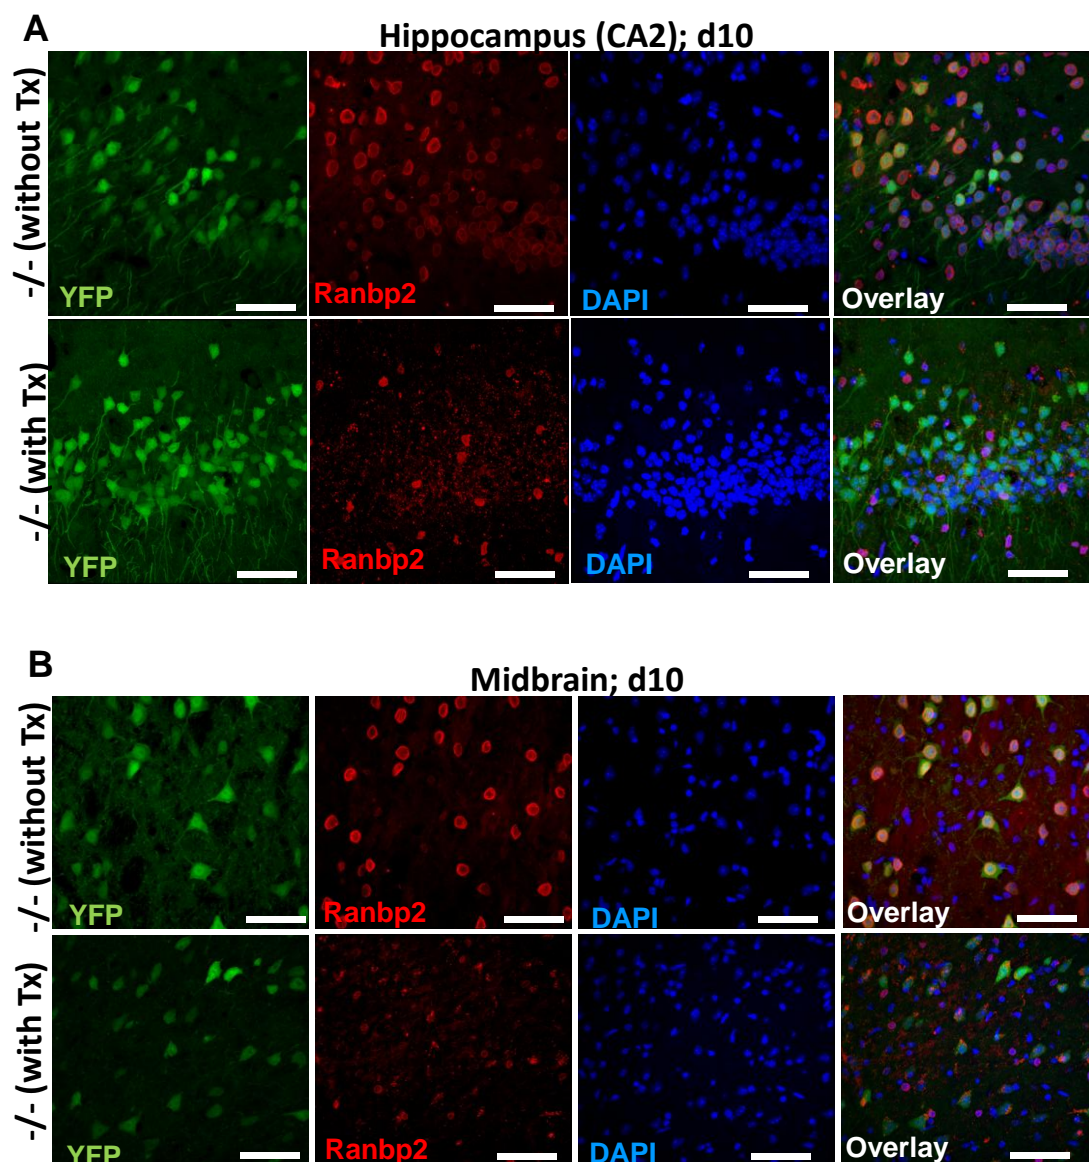

**Fig. S1.** Confocal images of YFP<sup>+</sup>-neurons from the CA2 region of the hippocampus (A) and midbrain (B) of sagittal brain cryosections of -/- mice with or without tamoxifen (Tx) administration and immunostained for Ranbp2. Sections were counterstained with DAPI. Immunostaining of Ranbp2 is lost from the nuclear rim of YFP<sup>+</sup>-neurons in Tx-treated mice and without causing overt morphological changes of YFP<sup>+</sup>-neurons. Legend: -/-, *SLICK-H::Ranbp2<sup>flox/flox</sup>*; d10, day 10 post-tamoxifen administration; scale bars=50  $\mu$ m.

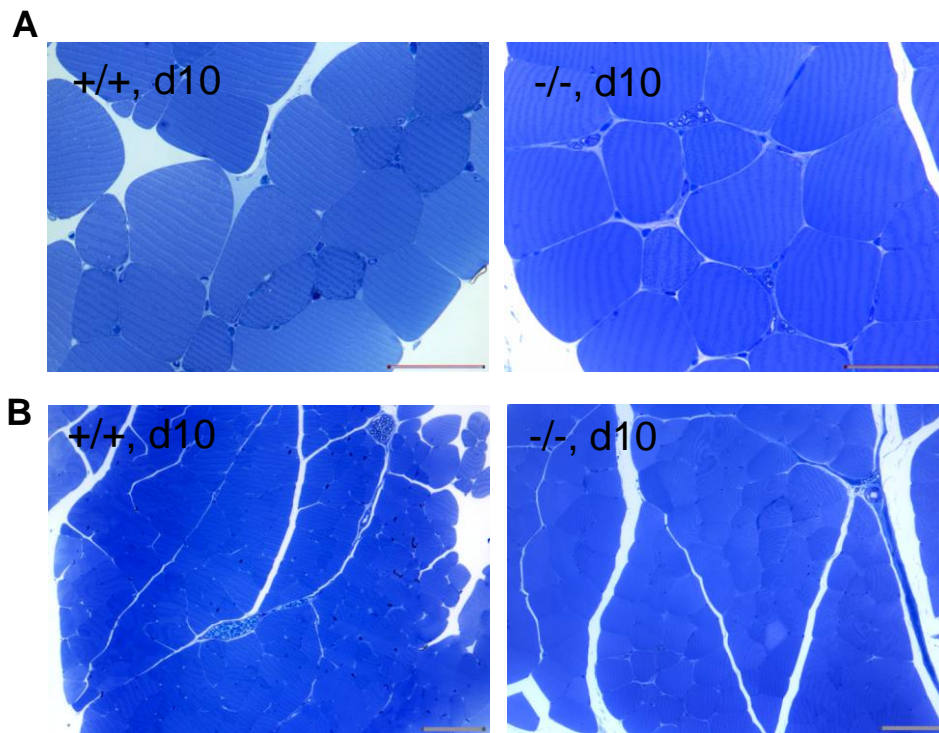

**Fig. S2.** Light microscopy of high (A) and low (B) magnification images of semithin sections of the gastrocnemius muscle stained with crystal violet of +/+ and -/- mice. No signs of denervation atrophy and muscle wasting is observed between genotypes. Legend: +/+, *SLICK-H::Ranbp2*<sup>+/+</sup>; -/-, *SLICK-H::Ranbp2*<sup>flox/flox</sup>; d10, day 10 post-tamoxifen administration; scale bars=50 μm.

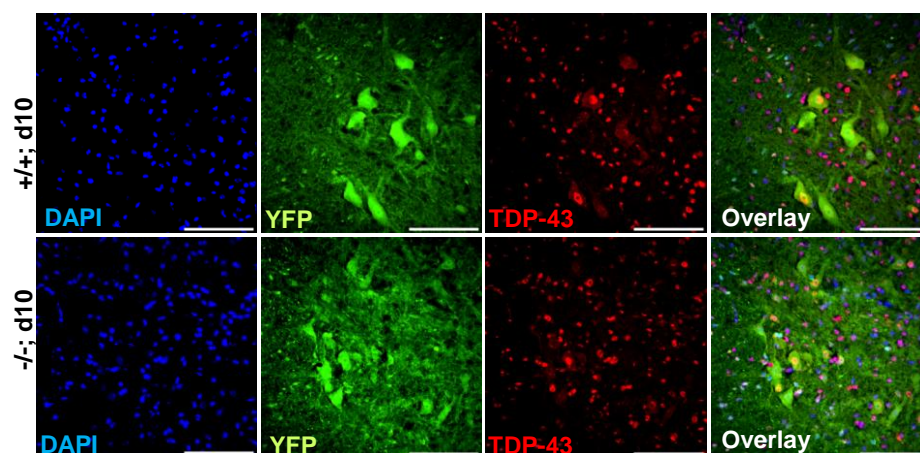

**Fig. S3.** Confocal images of YFP<sup>+</sup>-motoneurons of the anterior horn of the lumbar spinal cord immunostained for TDP-43. Sections were counterstained with DAPI. TDP-43 is localized to the nucleus of YFP<sup>+</sup>-motoneurons of +/+ and -/- mice. Legend: +/+, *SLICK-H::Ranbp2*<sup>+/+</sup>; -/-, *SLICK-H::Ranbp2*<sup>flox/flox</sup>; d10, day 10 post-tamoxifen administration; scale bars= 100  $\mu$ m.

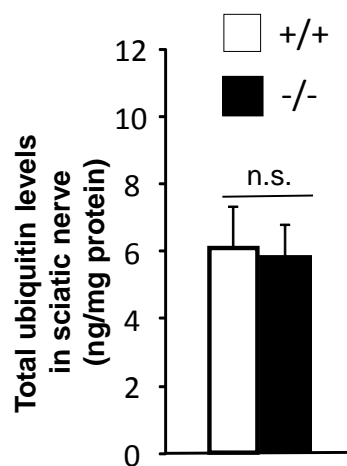

**Fig. S4.** Total ubiquitin levels are similar in the sciatic nerve of +/+ and -/- mice at d10. Data are expressed as mean  $\pm$  sd;  $n=4$  mice/genotype; Student's  $t$ -tests; Legend: +/+, *SLICK-H::Ranbp2*<sup>+/+</sup>; -/-, *SLICK-H::Ranbp2*<sup>fllox/fllox</sup>; d10, day 10 post-tamoxifen administration; n.s., non-significant.

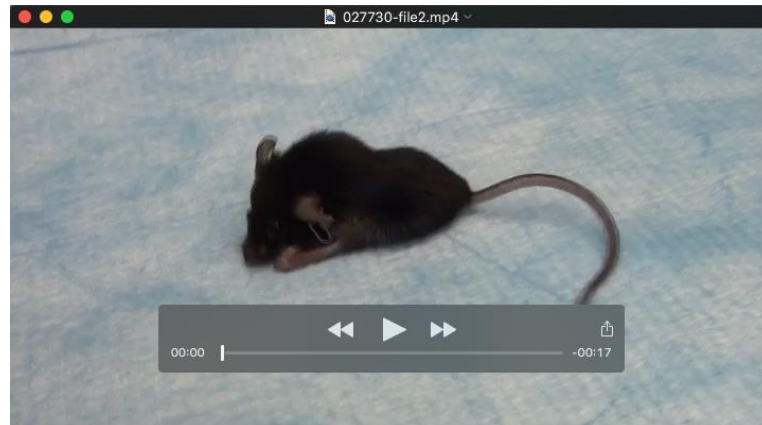

**Movie S1.** Locomotor behavior of *SLICK-H::Ranbp2<sup>flx/flx</sup>* (-/-) mice at day 9 post-tamoxifen administration.
